# Supplementary material for: Evidence of exposure to henipaviruses in domestic pigs in Uganda
Source: PubMed Central journal article supplement (PMC6849855; doi:10.1111/tbed.13105), 2019-01-19
Supplement: TBED-66-921-s001.pdf [file TBED-66-921-s001.pdf]

## Wambizzi Sampling: Pig Biodata

1. Date (DD/MM/YY): \_\_\_/\_\_\_/\_\_\_
2. Ear tag ID (identical to sample ID whole blood, serum, fecal sample, nasal swab, urine sample): \_\_\_\_\_
3. Rectal temperature °C \_\_\_.
4. Pig breed: local   
exotic   
cross
5. Gender: male  male intact Y / N  
female
6. Visible symptoms of disease (circle all that apply):

|             |             |              |                     |              |                        |
|-------------|-------------|--------------|---------------------|--------------|------------------------|
| 1=diarrhoea | 2= anorexia | 3=dullness   | 4=swaying gait      | 5=skin flash | 6=respiratory problems |
| 7=vomiting  | 8=coughing  | 9= shivering | 10=foaming at mouth | 11=wounds    | 12=Other               |

If other, please explain:

---

---

7. Pig source location (village, subcounty, district):

---

8. Gross pathology noted:

---

---

---

---

Barcode for:

- a. epididymis sample\_\_\_\_\_
- b. liver sample\_\_\_\_\_
- c. lung sample\_\_\_\_\_
- d. placenta sample\_\_\_\_\_
- e. spleen sample\_\_\_\_\_
- f. Tracheobronchial lymph nodes\_\_\_\_\_
